# Supplementary material for: Metatranscriptomics Reveals the Diversity of Genes Expressed by Eukaryotes in Forest Soils
Source: PLOS journal article supplement (doi:10.1371/journal.pone.0028967), 2012-01-06
Supplement: S5 (10.1371/journal.pone.0028967.s005) [file journal.pone.0028967.s005]

|                                           | spruce | beech |
|-------------------------------------------|--------|-------|
| Total no. of 18S rRNA sequences           | 73     | 85    |
| Putative chimeric sequences               | 4      | 23    |
| “good quality” 18S rRNA sequences         | 60     | 42    |
| No. of MOTUs (97 % nt identity threshold) | 49     | 30    |

**Table S1** Characteristics of the PCR-amplified 18S rRNA sequence datasets.

Putative chimeric sequences were identified using the CHECK\_CHIMERA program
