# Supplementary material for: Metatranscriptomics Reveals the Diversity of Genes Expressed by Eukaryotes in Forest Soils
Source: PLOS journal article supplement (doi:10.1371/journal.pone.0028967), 2012-01-06
Supplement: S7 (10.1371/journal.pone.0028967.s007) [file journal.pone.0028967.s007]

| KEGG pathway                                               | Enzyme                                       | Beech     | Spruce    |
|------------------------------------------------------------|----------------------------------------------|-----------|-----------|
| <b>Nitrogen metabolism</b>                                 |                                              | <b>13</b> | <b>17</b> |
|                                                            | glutamate synthase (NADPH)                   | 0         | 1         |
|                                                            | glutamate synthase (NADH)                    | 0         | 1         |
|                                                            | glutamate dehydrogenase                      | 0         | 2         |
|                                                            | glutamate dehydrogenase (NADP+)              | 6         | 2         |
|                                                            | asparaginase                                 | 0         | 1         |
|                                                            | glutamine synthase                           | 4         | 6         |
|                                                            | asparagine synthase (glutamine-hydrolysing)  | 0         | 1         |
| <b>Alanine, aspartate and glutamate metabolism</b>         |                                              | <b>19</b> | <b>26</b> |
|                                                            | glutamate dehydrogenase                      | 6         | 2         |
|                                                            | aspartate transaminase                       | 2         | 3         |
|                                                            | alanine transaminase                         | 2         | 0         |
|                                                            | glutamine synthase                           | 4         | 6         |
|                                                            | Asparaginase                                 | 0         | 1         |
| <b>Arginine and proline metabolism</b>                     |                                              | <b>20</b> | <b>22</b> |
|                                                            | glutamate dehydrogenase                      | 6         | 2         |
|                                                            | aspartate transaminase                       | 2         | 3         |
|                                                            | glutamine synthase                           | 4         | 6         |
|                                                            | arginase                                     | 1         | 0         |
| <b>beta-Alanine metabolism</b>                             |                                              | <b>6</b>  | <b>13</b> |
| <b>Cysteine and methionine metabolism</b>                  |                                              | <b>10</b> | <b>19</b> |
| <b>Glycine, serine and threonine metabolism</b>            |                                              | <b>10</b> | <b>14</b> |
|                                                            | threonine synthase                           | 0         | 1         |
| <b>Histidine metabolism</b>                                |                                              | <b>4</b>  | <b>4</b>  |
| <b>Lysine biosynthesis</b>                                 |                                              | <b>6</b>  | <b>2</b>  |
| <b>Lysine degradation</b>                                  |                                              | <b>7</b>  | <b>10</b> |
| <b>Phenylalanine metabolism</b>                            |                                              | <b>16</b> | <b>14</b> |
| <b>Phenylalanine, tyrosine and tryptophan biosynthesis</b> |                                              | <b>6</b>  | <b>8</b>  |
|                                                            | aspartate transaminase                       | 2         | 3         |
|                                                            | anthranilate synthase                        | 1         | 0         |
|                                                            | tryptophan synthase                          | 1         | 0         |
| <b>Tryptophan metabolism</b>                               |                                              | <b>8</b>  | <b>12</b> |
| <b>Tyrosine metabolism</b>                                 |                                              | <b>10</b> | <b>13</b> |
| <b>Valine, leucine and isoleucine biosynthesis</b>         |                                              | <b>3</b>  | <b>6</b>  |
| <b>Valine, leucine and isoleucine degradation</b>          |                                              | <b>18</b> | <b>15</b> |
| <b>Citrate cycle (TCA cycle)</b>                           |                                              | <b>19</b> | <b>29</b> |
|                                                            | malate dehydrogenase                         | 3         | 4         |
|                                                            | isocitrate dehydrogenase (NAD+)              | 0         | 3         |
|                                                            | isocitrate dehydrogenase (NADP+)             | 3         | 2         |
|                                                            | pyruvate dehydrogenase (acetyl-transferring) | 0         | 2         |
|                                                            | succinate dehydrogenase                      | 0         | 2         |
|                                                            | citrate (Si)-synthase                        | 2         | 2         |
|                                                            | ATP citrate synthase                         | 0         | 3         |
|                                                            | phosphoenolpyruvate carboxykinase (ATP)      | 0         | 3         |

|                                              |           |           |
|----------------------------------------------|-----------|-----------|
| <b>Glycolysis / Gluconeogenesis</b>          | <b>21</b> | <b>48</b> |
| glyceraldehyde-3-phosphate dehydrogenase     | 1         | 10        |
| pyruvate dehydrogenase (acetyl-transferring) | 0         | 2         |
| hexokinase                                   | 0         | 1         |
| fructose-bisphosphatase                      | 0         | 2         |
| pyruvate decarboxylase                       | 0         | 1         |
| phosphoenolpyruvate carboxykinase (ATP)      | 1         | 3         |
| triose-phosphate isomerase                   | 1         | 5         |
| glucose-6-phosphate isomerase                | 0         | 2         |
| phosphoglucomutase                           | 1         | 3         |
| acetate---CoA ligase                         | 0         | 1         |
| <b>Pentose phosphate pathway</b>             | <b>15</b> | <b>20</b> |
| glucose-6-phosphate dehydrogenase            | 1         | 1         |
| transketolase                                | 3         | 3         |
| fructose-bisphosphatase                      | 0         | 2         |
| fructose-bisphosphate aldolase               | 4         | 4         |
| phosphoglucomutase                           | 1         | 3         |
| <b>Pyruvate metabolism</b>                   | <b>20</b> | <b>21</b> |
| malate dehydrogenase                         | 3         | 4         |
| pyruvate dehydrogenase (acetyl-transferring) | 0         | 2         |
| homocitrate synthase                         | 1         | 1         |
| malate synthase                              | 1         | 1         |
| phosphoenolpyruvate carboxykinase (ATP)      | 1         | 3         |
| <b>Galactose metabolism</b>                  | <b>4</b>  | <b>7</b>  |
| hexokinase                                   | 0         | 1         |
| beta-galactosidase                           | 0         | 1         |
| phosphoglucomutase                           | 1         | 3         |
| 6-phosphofructokinase                        | 1         | 0         |
| <b>Fructose and mannose metabolism</b>       | <b>12</b> | <b>18</b> |
| hexokinase                                   | 0         | 1         |
| triose-phosphate isomerase                   | 1         | 5         |
| aldehyde reductase                           | 1         | 0         |
| <b>Starch and sucrose metabolism</b>         | <b>16</b> | <b>18</b> |
| hexokinase                                   | 0         | 1         |
| alpha-amylase                                | 0         | 1         |
| phosphoglucomutase                           | 1         | 3         |
| <b>Sulfur metabolism</b>                     | <b>2</b>  | <b>3</b>  |
| adenylyl-sulfate kinase                      | 1         | 0         |
| sulfate adenylyltransferase                  | 1         | 1         |

**Table S3:** An illustration of some of the key enzymes identified in major KEGG metabolic pathways relevant to either C, N or S metabolism.
