# Supplementary material for: Metatranscriptomics Reveals the Diversity of Genes Expressed by Eukaryotes in Forest Soils
Source: PLOS journal article supplement (doi:10.1371/journal.pone.0028967), 2012-01-06
Supplement: S8 (10.1371/journal.pone.0028967.s008) [file journal.pone.0028967.s008]

| Category                                                            | family | potential enzyme activity               | beech            | spruce           |
|---------------------------------------------------------------------|--------|-----------------------------------------|------------------|------------------|
| <b>Proteases<sup>ns</sup> (MEROPS database)</b>                     |        |                                         | <b>11 (13.9)</b> | <b>13 (15.1)</b> |
|                                                                     | A1     | Aspartic endopeptidase                  | 6                | 3                |
|                                                                     | G1     | Acid protease                           | 1                | 0                |
|                                                                     | M14    | carboxypeptidase                        | 0                | 1                |
|                                                                     | M24    | Prolidase                               | 0                | 1                |
|                                                                     | M28E   | leucyl- aminopeptidase                  | 1                | 0                |
|                                                                     | S8     | subtilisin like serine protease         | 1                | 4                |
|                                                                     | S10    | serine carboxypeptidase                 | 0                | 1                |
|                                                                     | S53    | tripeptidyl-peptidase                   | 2                | 3                |
| <b>Cytochrome P450 monooxygenases<sup>ns</sup> (CYPED database)</b> |        |                                         | <b>9 (11.4)</b>  | <b>17 (19.7)</b> |
|                                                                     | 102A   | FAD-binding oxidoreductase              | 1                | 2                |
|                                                                     | 116B   | ferredoxin                              | 1                | 0                |
|                                                                     | 501A   | lanosterol 14- $\alpha$ -demethylase    | 0                | 1                |
|                                                                     | 505A   | fatty acid hydroxylase                  | 1                | 0                |
|                                                                     | 512A   | ent-kaurene oxidase                     | 1                | 0                |
|                                                                     | 52A    | alkane hydroxylase                      | 0                | 1                |
|                                                                     | 55A    | nitric oxide reductase                  | 0                | 2                |
|                                                                     | 57A    | NA                                      | 0                | 2                |
|                                                                     | 584G   | alkane hydroxylase                      | 3                | 2                |
|                                                                     | 620H   | O-methylsterigmatocystin oxidoreductase | 1                | 2                |
|                                                                     | 65AF   | benzoate 4-monooxygenase                | 1                | 4                |
|                                                                     | 704A   | NA                                      | 0                | 1                |
| <b>Lipases/esterases<sup>ns</sup> (LED database)</b>                |        |                                         | <b>0</b>         | <b>2</b>         |
|                                                                     | abH03  | Carotenoid ester lipase                 | 0                | 1                |
|                                                                     | abH36  | Cutinase                                | 0                | 1                |
| <b>Phytases<sup>ns</sup></b>                                        | NA     | phytase                                 | <b>0</b>         | <b>1</b>         |
| <b>Dioxygenases<sup>ns</sup></b>                                    | NA     | Catechol 1,2-dioxygenase                | <b>0</b>         | <b>1</b>         |

**Table S4:** An illustration of the diversity of potential organic matter degrading enzymes, other than plant cell wall and polysaccharide active ones, identified among the beech and spruce soil ESTs. NA, not applicable.

For the main categories, between parentheses are given the figures extrapolated to a common sample size of 10,000 cDNAs. Differences between Beech and Spruce were tested using a Chi-square test; \*\*,  $P < 0.01$ ; \*,  $0.01 < P < 0.05$ ; <sup>ns</sup>, not significant,  $P > 0.05$ .
